# Supplementary material for: Design of highly efficient energy transfer phosphor Sr4Al14O25:Eu2+,Mn4+ with deep-red emission and application potential in plant growth
Source: Royal Society of Chemistry journal article supplement (doi:10.1039/d3tc00093a), 2023-01-01
Supplement: d3tc00093a1.pdf [file d3tc00093a1.pdf]

## Supporting information

### **Design of highly efficient energy transfer phosphor $\text{Sr}_4\text{Al}_{14}\text{O}_{25}:\text{Eu}^{2+}, \text{Mn}^{4+}$ in deep-red emitting with application potential in plant growth**

*Cancan Li<sup>1</sup>, Yunpeng Zhou<sup>1</sup>, Takatoshi Seto<sup>1,\*</sup>, Yuhua Wang<sup>1,\*</sup>*

<sup>1</sup> Key Laboratory for Special Function Materials and Structural Design of the Ministry of Education,

National & Local Joint Engineering Laboratory for Optical Conversion Materials and Technology of National Development and Reform Commission, Department of Materials Science,

School of Materials and Energy, Lanzhou University, No. 222, South Tianshui Road, Lanzhou, Gansu, 730000, P. R. China,

\*Corresponding author: Takatoshi Seto - E-mail: [seto@lzu.edu.cn](mailto:seto@lzu.edu.cn)

Yuhua Wang - E-mail: [wyh@lzu.edu.cn](mailto:wyh@lzu.edu.cn)

ID 0000-0002-3928-2557 (T. Seto), ID 0000-0001-7047-4760 (Y. Wang)

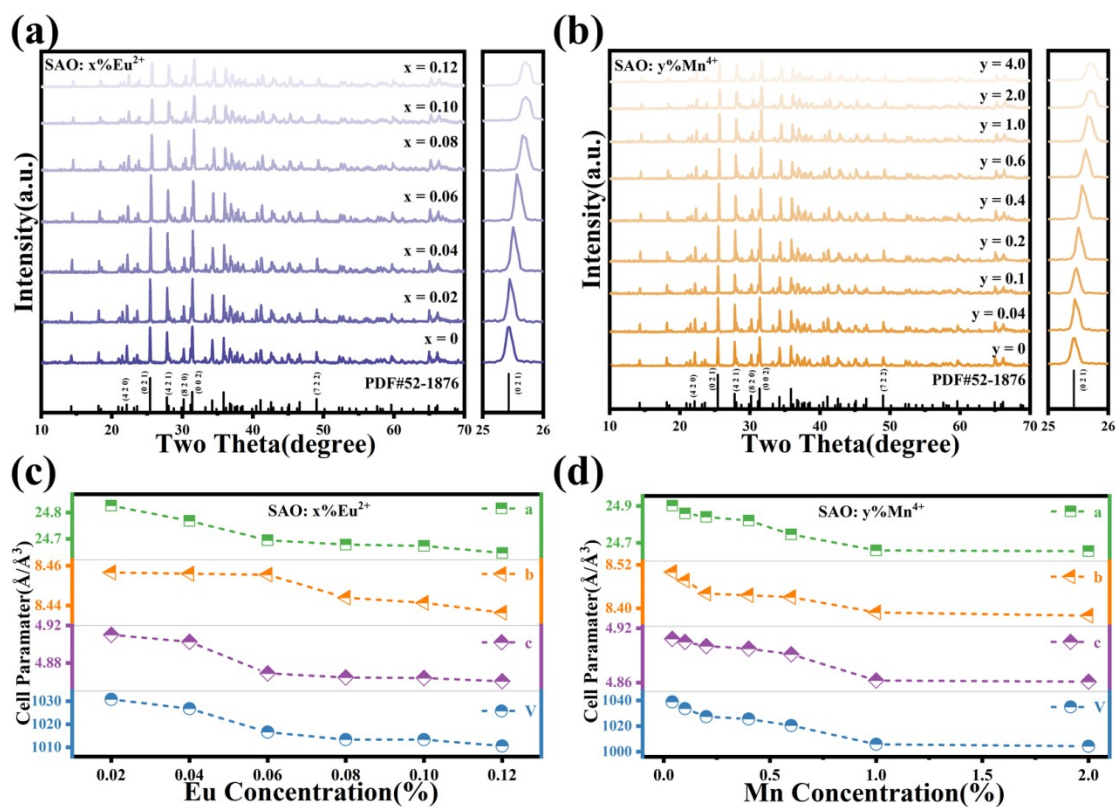

**Fig. S1** (a) and (b) are XRD patterns of SAO:  $x\% \text{Eu}^{2+}$  and SAO:  $y\% \text{Mn}^{4+}$ . Rights are the peak shifts of (0 2 1). ( $0 \leq x\% \leq 0.12\%$ ,  $0 \leq y\% \leq 4.0\%$ ) (c) Dependence of lattice parameters and unit cell volume on  $\text{Eu}^{2+}$  concentration and (d)  $\text{Mn}^{4+}$  concentration.

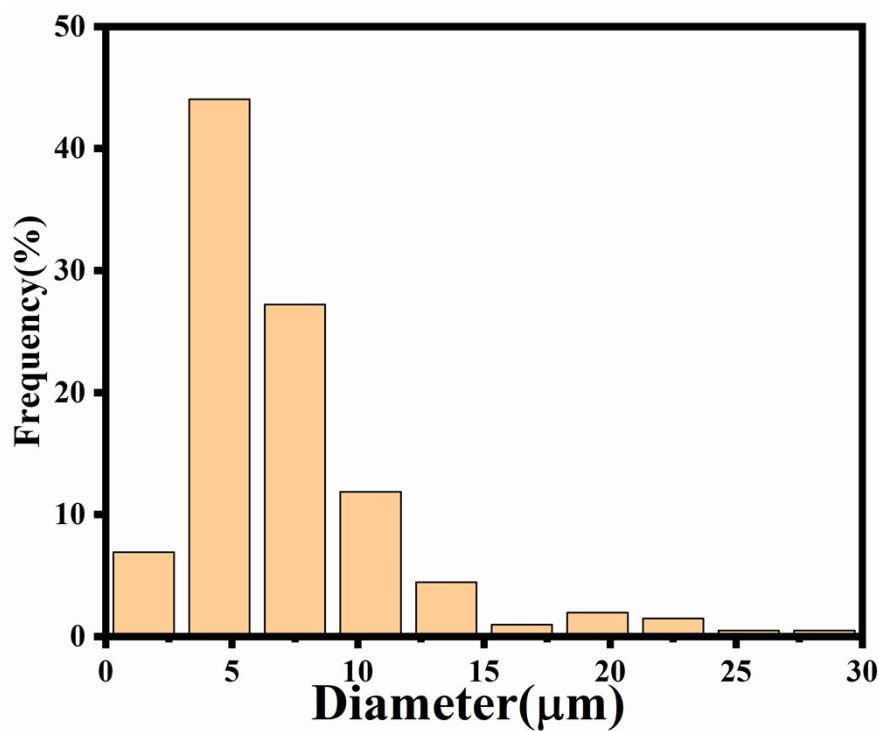

**Fig. S2** SEM particle size distribution of SAO:  $\text{Eu}^{2+}$ ,  $\text{Mn}^{4+}$ .

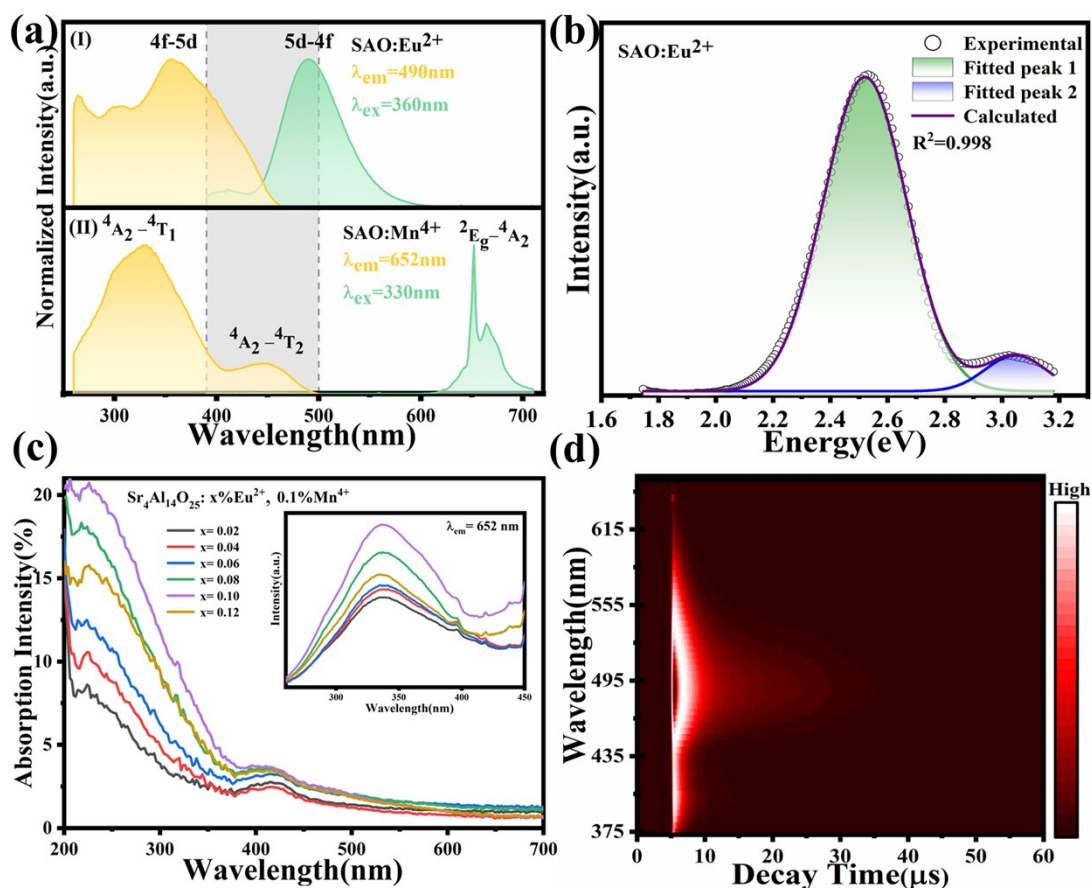

**Fig. S3(a)** PLE and PL spectra of SAO: Eu<sup>2+</sup>; SAO: Mn<sup>4+</sup>. **(b)** Gauss fitting of PL in SAO: 0.1%Eu<sup>2+</sup>. **(c)** The absorption spectra of SAO: x%Eu<sup>2+</sup>, 0.1%Mn<sup>4+</sup>, (0.02 ≤ x% ≤ 0.12%). Inset shows relative PLE spectra monitored at 652 nm. **(d)** TRPL of SAO: 0.1%Eu<sup>2+</sup>.

**Note:** **Fig. S3(a) (I)** performs the excitation and emission peak of SAO: 0.1%Eu<sup>2+</sup>. The excitation of Eu<sup>2+</sup> has a large broad band range from 240 nm to 480 nm peaked at 360 nm. The emission spectrum exhibits a large broad band from 380 nm to 600 nm with peak located at 490 nm. As shown in **Fig. S3(b)**, the emission can be well-fitted into two Gaussian peaks appeared at 407 nm (3.047 eV) and 492 nm (2.521 eV). **Fig. S3(d)** presents the time-resolved photoluminescence (TRPL) mapping of Eu<sup>2+</sup>, which has the same shape as the PL spectrum shown in **Fig. S3(a) (I)**. And it clearly reveals the two peaks of Eu<sup>2+</sup> and can also directly prove the two luminescent centers of Eu<sup>2+</sup>. As displayed in **Fig. 1(d)**, Eu<sup>2+</sup> can occupy two types of Sr<sup>2+</sup> due to the similar radius of two ions, causing two types of emission centers. Generally, the Van Uitert

empirical equation below was involved to collect the energy of emission peak ( $E$ ):<sup>1-3</sup>

$$E(\text{cm}^{-1}) = Q \times \left[ 1 - \left( \frac{V}{4} \right)^{\frac{1}{V}} \times 10^{\frac{-nrE_a}{80}} \right] \quad (1)$$

where  $Q$  and  $V$  represent the lower d-band edge and valence state of  $\text{Eu}^{2+}$ , respectively.  $E_a$  is the anion's electron affinity.  $r$  and  $n$  refer to the radius and the coordination number of the cation substituted, respectively. In this system, the  $E_a$  and  $V$  are constant, so  $E$  is determined by the values of  $r$  and  $n$ . The higher the value of  $nr$ , the higher the value of  $E$ , and the shorter the emission wavelength. Hence, the emission peak at 407 nm is ascribed to the  $\text{Eu}^{2+}$  occupying the  $\text{Sr}_2$  sites with ten-coordination, while the longer wavelength peaked at 492 nm can be attributed to  $\text{Eu}^{2+}$  occupying the  $\text{Sr}_1$  site with seven-coordination.

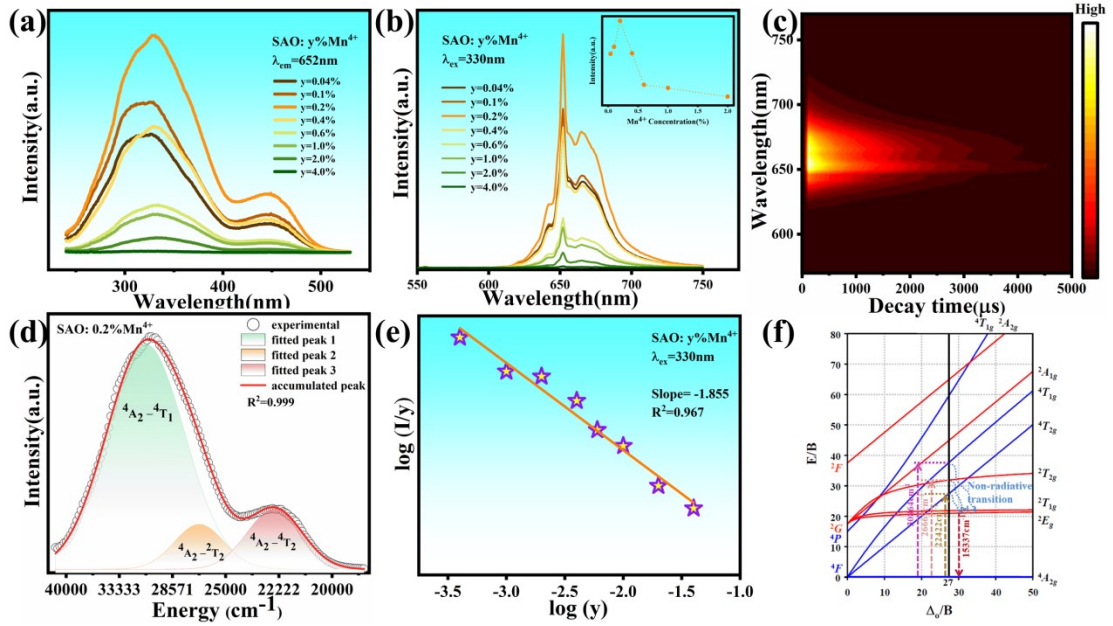

**Fig. S4(a)** PLE spectra of SAO:  $y\%\text{Mn}^{4+}$  ( $0.04\% \leq y \leq 4.0\%$ ). **(b)** PL spectra of SAO:  $y\%\text{Mn}^{4+}$ . Inset shows emission intensity on different  $\text{Mn}^{4+}$  concentrations. **(c)** TRPL spectrum of SAO:  $0.2\%\text{Mn}^{4+}$ . **(d)** Gauss fitting of PLE spectrum of SAO:  $0.2\%\text{Mn}^{4+}$ . **(e)** The functional dependence of  $\log(I/y)$  on  $\log(y)$ . **(f)** Tanabe-Sugano energy level diagram of SAO:  $0.2\%\text{Mn}^{4+}$ .

**Note:** In this work, the main part is about  $\text{Mn}^{4+}$ . **Fig. S4(a)** and **(b)** illustrate the

excitation ( $\lambda_{em}=652$  nm) and emission ( $\lambda_{ex}=330$  nm) spectra of series samples SAO:  $y\%Mn^{4+}$  ( $0 \leq y\% \leq 4.0\%$ ). The PLE spectra have a broad range from 270 nm to 550 nm. As for the PL spectra of  $Mn^{4+}$ , under the excitation spectra of  $Mn^{4+}$  at 330 nm, the emission spectra present a red-emitting narrow band from 600 nm to 750 nm with peak at 652 nm and with a full width at half maximum (FWHM) of 23-27 nm, which matches well with the absorption range of chlorophyll A, and chlorophyll B in plants. The inset in **Fig. S4(b)** describes the relationship between emission intensity on  $Mn^{4+}$  concentration, where both the excitation intensity and the emission intensity first increase with the increasing of the  $Mn^{4+}$  ion doping concentration, and when  $y\%$  reaches 0.2%, both reach the maximum value, and then their intensities gradually decrease as the continuous rising of the  $Mn^{4+}$  ion. In order to clarify the situation related to the luminescent center in the SAO:  $0.2\%Mn^{4+}$ , a series of decay curves of the samples were monitored under the excitation of  $Mn^{4+}$  at 330 nm from 570 nm to 770 nm in 4 nm steps. **Fig. S4(c)** depicts the time-resolved photoluminescence (TRPL) mapping. It appears to have a similar shape with the PL spectrum, without the shifting of the PL peak at 652nm over the entire range from 10 to 6000 $\mu$ s, indicating that only one type of luminescent center exists in SAO:  $0.2\%Mn^{4+}$ .

To further study the concentration quenching behavior of SAO:  $y\%Mn^{4+}$  samples, it's wise to take the critical distance  $R_c$  into consideration, and its value can be calculated by the following formula: <sup>4</sup>

$$R_c \approx 2 \left[ \frac{3V}{4\pi x_c Z} \right]^{1/3} \quad (2)$$

In which,  $V$  represents the unit cell volume,  $x_c$  represents the critical doping concentration of  $Mn^{4+}$  ions, and  $Z$  represents the number of units in the unit cell. For SAO:  $0.2\%Mn^{4+}$  phosphor,  $V=1016.75\text{\AA}^3$ ,  $x_c=0.002$  and  $Z=2$ , so the calculated  $R_c$  is 7.86 nm. This value is much larger than the interaction distance of 5  $\text{\AA}$  between the activator ions, thus the concentration quenching behavior of SAO:  $y\%Mn^{4+}$  belongs to the multipolar-multipolar interaction, which can be divided into dipole-dipole(d-d), dipole-quadrupole(d-q), quadrupole-quadrupole(q-q), three types. These three types can be distinguished in accordance with the value of  $\theta$ , which are able to be calculated

according to Dexter's theory by the following formula: <sup>5</sup>

$$\frac{I}{y} = k[1 + \beta(y)^{\theta/3}]^{-1} \quad (3)$$

Where the symbol  $I$  represents the emission intensity,  $y$  represents the  $\text{Mn}^{4+}$  doping concentration, and  $k$  and  $\beta(y)$  are related to the excitation conditions and the specific lattice matrix, respectively.  $\theta$  values are 6, 8, 10, corresponding to d-d, d-q, q-q interactions, respectively.

The value of  $\theta$  is usually given by the slope of the functional dependence of  $\log(I/y)$  on  $\log(y)$ . As can be seen from **Fig. S4(e)**, under the excitation of 330 nm, the slope of the fitting curve is -1.855. The calculated  $\theta$  values 5.565, closing to 6, which indicates that the SAO:  $y\%\text{Mn}^{4+}$  concentration quenching mechanism belongs to d-d interaction type.

As exhibited in **Fig. S4(d)**, the excitation spectra can be well fitted into three Gaussian peaks located at  $30864 \text{ cm}^{-1}$  (324 nm),  $26667 \text{ cm}^{-1}$  (375 nm),  $22422 \text{ cm}^{-1}$  (446 nm), and ascribed to  ${}^4\text{A}_2 \rightarrow {}^4\text{T}_1$ ,  ${}^4\text{A}_2 \rightarrow {}^2\text{T}_2$ , and  ${}^4\text{A}_2 \rightarrow {}^4\text{T}_2$  transition of  $\text{Mn}^{4+}$ , respectively. It is noticed that the two peaks at 375 nm and 446 nm are able to be matched well with the emission spectra of  $\text{Eu}^{2+}$  shown in **Fig. S3(a)**, suggesting that it satisfies the condition of energy transfer.

The splitting of energy levels for  $\text{Mn}^{4+}$  affected by the crystal field environment can usually be expressly illustrated through the Tanabe-Sugano (TS) diagram in **Fig. S4(f)**. In general, the crystal field can be determined by three parameters, namely the crystal field intensity  $Dq$ , Racah parameters  $B$  and  $C$ . They are directly related to the PLE and PL spectra, and these values can be estimated from following functions: <sup>6</sup>

$$Dq = \frac{E({}^4\text{A}_2 - {}^4\text{T}_2)}{10} \quad (4)$$

$$\frac{Dq}{B} = \frac{15(x - 8)}{(x^2 - 10x)} \quad (5)$$

$$x = \frac{E({}^4\text{A}_2 - {}^4\text{T}_1) - E({}^4\text{A}_2 - {}^4\text{T}_2)}{Dq} \quad (6)$$

$$\frac{E(^2E_g - ^4A_2)}{B} = \frac{3.05C}{B} + 7.9 - \frac{1.8B}{D_q} \quad (7)$$

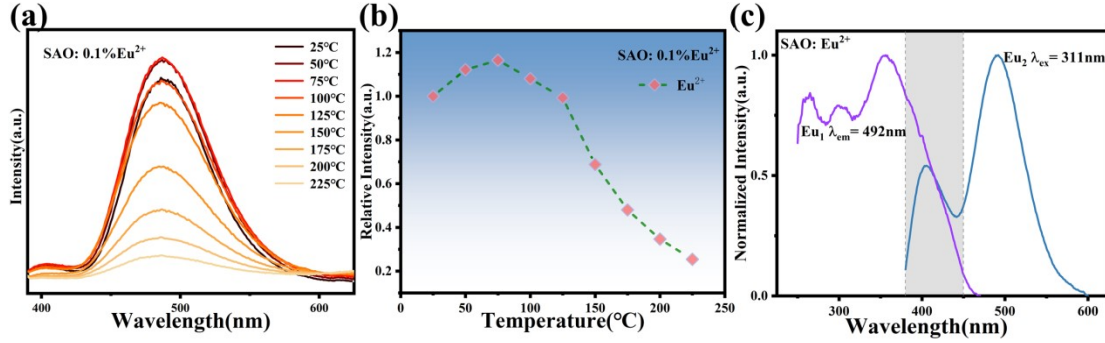

**Fig. S5**(a) PL spectra and (b) relative emission intensity of SAO: Eu<sup>2+</sup> at different temperatures. (c) The normalized emission spectrum of Eu<sub>2</sub> (monitored at 311 nm) and excitation spectrum of Eu<sub>1</sub> (monitored at 492 nm). (The grey area means the overlapped region).

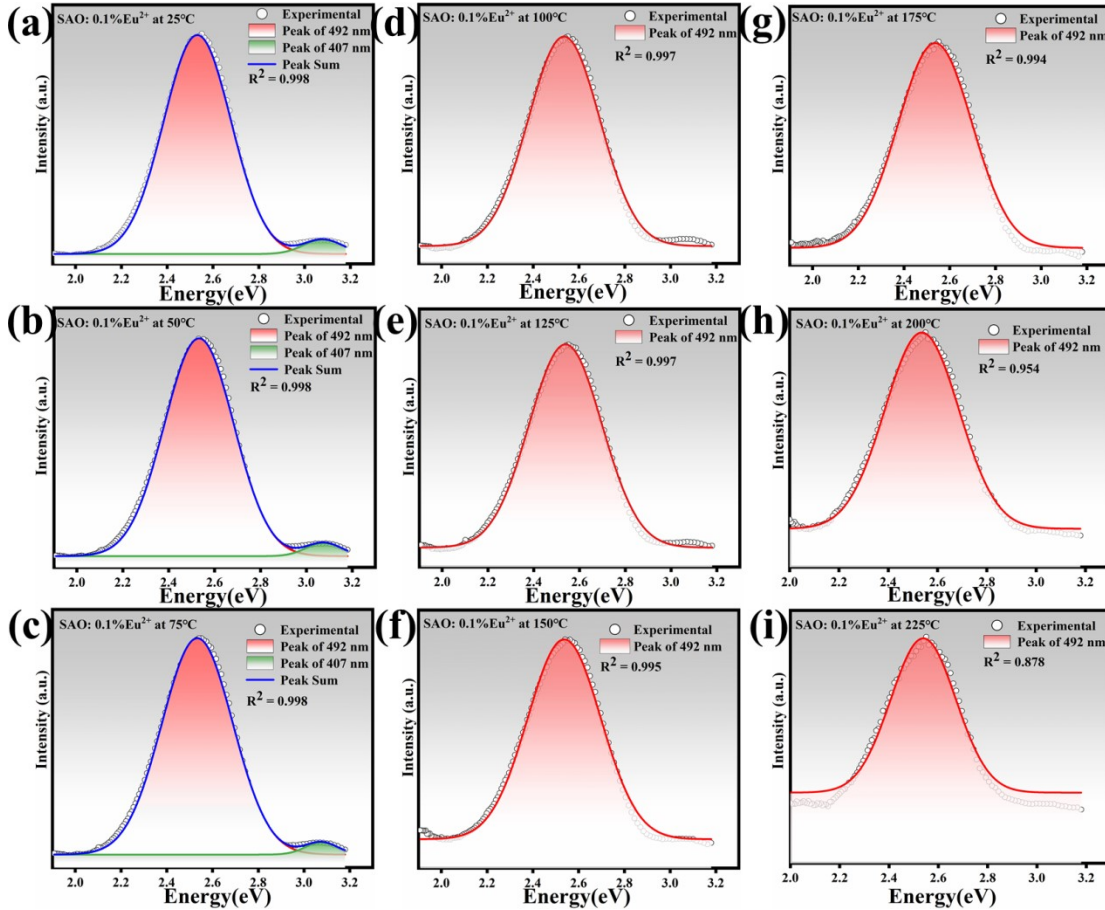

**Fig. S6** The fitting peaks in PL spectra of SAO: Eu at different temperatures. (a)25°C, (b)50°C, (c)75°C, (d)100°C, (e)125°C, (f)150°C, (g)175°C, (h)200°C, (i)225°C.

**Table S1** Matrix sample structure refinement information of Sr<sub>4</sub>Al<sub>14</sub>O<sub>25</sub>

| Formula | Sr <sub>4</sub> Al <sub>14</sub> O <sub>25</sub> |
|---------|--------------------------------------------------|
|---------|--------------------------------------------------|

|                                 |              |
|---------------------------------|--------------|
| Crystal System                  | Orthorhombic |
| Space-group                     | $P m m a$    |
| a (Å)                           | 24.69(7)     |
| b(Å)                            | 8.45(4)      |
| c(Å)                            | 4.87(0)      |
| $\alpha=\beta=\gamma(^{\circ})$ | $90^{\circ}$ |
| V(Å <sup>3</sup> )              | 1016.755     |
| R <sub>wp</sub>                 | 0.1133       |
| R <sub>p</sub>                  | 0.0847       |
| $\chi^2$                        | 1.798        |

**Table S2.** Refined atomic coordinates and ionic occupancies of SAO host

| Atom            | x             | y            | z             | Occupancy |
|-----------------|---------------|--------------|---------------|-----------|
| Sr <sub>1</sub> | 0.1382100(0)  | 0.5000000(0) | 0.0334460(0)  | 1.000     |
| Sr <sub>2</sub> | 0.12176300(0) | 0.0000000(0) | 0.1106860(0)  | 1.000     |
| Al <sub>1</sub> | 0.1818550(0)  | 0.1890570(0) | 0.6399910(0)  | 1.000     |
| Al <sub>2</sub> | 0.0633530(0)  | 0.3154890(0) | 0.4889800(0)  | 1.000     |
| Al <sub>3</sub> | 0.2500000(0)  | 0.3055320(0) | 0.1498890(0)  | 1.000     |
| Al <sub>4</sub> | 0.0000000(0)  | 0.1817030(0) | 0.0000000(0)  | 1.000     |
| Al <sub>5</sub> | 0.0000000(0)  | 0.0000000(0) | 0.5000000(0)  | 1.000     |
| Al <sub>6</sub> | 0.0000000(0)  | 0.5000000(0) | 0.0000000(0)  | 1.000     |
| O <sub>1</sub>  | 0.0438010(0)  | 0.1425280(0) | 0.3130020(0)  | 1.000     |
| O <sub>2</sub>  | 0.1400690(0)  | 0.3341260(0) | 0.4950880(0)  | 1.000     |
| O <sub>3</sub>  | 0.1957760(0)  | 0.2345220(0) | -0.0380520(0) | 1.000     |
| O <sub>4</sub>  | 0.2500000(0)  | 0.2516130(0) | 0.4472130(0)  | 1.000     |
| O <sub>5</sub>  | 0.0283410(0)  | 0.0000000(0) | 0.81458160(0) | 1.000     |
| O <sub>6</sub>  | 0.0435740(0)  | 0.5000000(0) | 0.3048650(0)  | 1.000     |
| O <sub>7</sub>  | 0.1662780(0)  | 0.0000000(0) | 0.5867110(0)  | 1.000     |
| O <sub>8</sub>  | 0.0436640(0)  | 0.3402850(0) | 0.8529530(0)  | 1.000     |
| O <sub>9</sub>  | 0.2500000(0)  | 0.5000000(0) | 0.1103960(0)  | 1.000     |

**Table S3.** Coordinate and bond lengths of Sr<sub>1</sub> in SAO host

| Vector                          | Length/Å  |
|---------------------------------|-----------|
| Sr <sub>1</sub> -O <sub>1</sub> | 2.583(17) |
| Sr <sub>1</sub> -O <sub>1</sub> | 2.583(17) |
| Sr <sub>1</sub> -O <sub>3</sub> | 2.683(17) |
| Sr <sub>1</sub> -O <sub>3</sub> | 2.683(17) |
| Sr <sub>1</sub> -O <sub>5</sub> | 2.47(3)   |
| Sr <sub>1</sub> -O <sub>7</sub> | 2.85(3)   |
| Sr <sub>1</sub> -O <sub>7</sub> | 2.51(3)   |

**Table S4.** Coordinate and band lengths of Sr<sub>2</sub> in SAO host

| Vector                          | Length/Å   |
|---------------------------------|------------|
| Sr <sub>2</sub> -O <sub>2</sub> | 2.97859(8) |
| Sr <sub>2</sub> -O <sub>2</sub> | 2.65449(6) |
| Sr <sub>2</sub> -O <sub>2</sub> | 2.97859(8) |
| Sr <sub>2</sub> -O <sub>2</sub> | 2.65449(6) |
| Sr <sub>2</sub> -O <sub>3</sub> | 2.68350(6) |
| Sr <sub>2</sub> -O <sub>3</sub> | 2.68350(6) |
| Sr <sub>2</sub> -O <sub>6</sub> | 2.68910(6) |
| Sr <sub>2</sub> -O <sub>8</sub> | 2.84108(5) |
| Sr <sub>2</sub> -O <sub>8</sub> | 2.84108(5) |
| Sr <sub>2</sub> -O <sub>9</sub> | 2.79015(7) |

**Table S5.** Coordinate and band lengths of Al<sub>1</sub> in SAO host

| Vector                          | Length/Å   |
|---------------------------------|------------|
| Al <sub>1</sub> -O <sub>2</sub> | 1.75398(3) |
| Al <sub>1</sub> -O <sub>3</sub> | 1.65347(5) |
| Al <sub>1</sub> -O <sub>4</sub> | 2.00135(4) |
| Al <sub>1</sub> -O <sub>7</sub> | 1.66685(4) |

**Table S6.** Coordinate and band lengths of Al<sub>2</sub> in SAO host

| Vector                          | Length/Å   |
|---------------------------------|------------|
| Al <sub>2</sub> -O <sub>1</sub> | 1.76507(4) |
| Al <sub>2</sub> -O <sub>2</sub> | 1.90412(5) |
| Al <sub>2</sub> -O <sub>6</sub> | 1.86726(4) |
| Al <sub>2</sub> -O <sub>8</sub> | 1.85307(5) |

**Table S7.** Coordinate and band lengths of Al<sub>3</sub> in SAO host

| Vector                          | Length/Å    |
|---------------------------------|-------------|
| Al <sub>3</sub> -O <sub>3</sub> | 1.73214 (3) |
| Al <sub>3</sub> -O <sub>3</sub> | 1.73214(3)  |
| Al <sub>3</sub> -O <sub>4</sub> | 1.52060(4)  |
| Al <sub>3</sub> -O <sub>9</sub> | 1.65780(4)  |

**Table S8.** Coordinate and band lengths of Al<sub>4</sub> in SAO host

| Vector                          | Length/Å   |
|---------------------------------|------------|
| Al <sub>4</sub> -O <sub>1</sub> | 1.90132(4) |
| Al <sub>4</sub> -O <sub>1</sub> | 1.90132(4) |
| Al <sub>4</sub> -O <sub>5</sub> | 1.91755(4) |
| Al <sub>4</sub> -O <sub>5</sub> | 1.91755(4) |
| Al <sub>4</sub> -O <sub>8</sub> | 1.86645(3) |
| Al <sub>4</sub> -O <sub>8</sub> | 1.86645(3) |

**Table S9.** Coordinate and band lengths of Al<sub>5</sub> in SAO host

| Vector                          | Length/Å   |
|---------------------------------|------------|
| Al <sub>5</sub> -O <sub>1</sub> | 1.86065(3) |
| Al <sub>5</sub> -O <sub>5</sub> | 1.68684(4) |
| Al <sub>5</sub> -O <sub>5</sub> | 1.68684(4) |

**Table S10.** Coordinate and bond lengths of Al<sub>6</sub> in SAO host

| Vector                          | Length/Å   |
|---------------------------------|------------|
| Al <sub>6</sub> -O <sub>6</sub> | 1.83664(4) |
| Al <sub>6</sub> -O <sub>6</sub> | 1.83664(4) |
| Al <sub>6</sub> -O <sub>8</sub> | 1.87337(3) |

**Table S11** Distances between Sr<sub>1</sub> and Al atoms in SAO host

| Vector                           | Length/Å   |
|----------------------------------|------------|
| Sr <sub>1</sub> -Al <sub>1</sub> | 3.16918(6) |
| Sr <sub>1</sub> -Al <sub>1</sub> | 3.38209(7) |
| Sr <sub>1</sub> -Al <sub>1</sub> | 3.16918(6) |
| Sr <sub>1</sub> -Al <sub>1</sub> | 3.38209(7) |
| Sr <sub>1</sub> -Al <sub>2</sub> | 3.55360(6) |
| Sr <sub>1</sub> -Al <sub>2</sub> | 3.55360(6) |
| Sr <sub>1</sub> -Al <sub>4</sub> | 3.42451(7) |
| Sr <sub>1</sub> -Al <sub>4</sub> | 3.42451(7) |
| Sr <sub>1</sub> -Al <sub>5</sub> | 3.56030(7) |

**Table S12** Distances between Sr<sub>2</sub> and Al atoms in SAO host

| Vector                           | Length/Å   |
|----------------------------------|------------|
| Sr <sub>2</sub> -Al <sub>1</sub> | 3.43230(7) |
| Sr <sub>2</sub> -Al <sub>1</sub> | 3.43230(7) |
| Sr <sub>2</sub> -Al <sub>2</sub> | 3.59485(7) |
| Sr <sub>2</sub> -Al <sub>2</sub> | 3.28733(6) |
| Sr <sub>2</sub> -Al <sub>2</sub> | 3.59485(7) |
| Sr <sub>2</sub> -Al <sub>2</sub> | 3.28733(6) |
| Sr <sub>2</sub> -Al <sub>3</sub> | 3.26770(6) |
| Sr <sub>2</sub> -Al <sub>3</sub> | 3.26770(6) |
| Sr <sub>2</sub> -Al <sub>6</sub> | 3.42209(9) |



## Reference

1. W. Geng, X. Zhou, J. Ding, G. Li and Y. Wang, *Journal of Materials Chemistry C*, 2017, **5**, 11605-11613.
2. H. Chen and Y. Wang, *Journal of the American Ceramic Society*, 2021, **105**, 1095-1105.
3. L. G. Vanuitert, *Journal of Luminescence*, 1984, **29**, 1-9.
4. X. Ma, P. Feng, Y. Wang, S. Ding, S. Tian and Y. Wang, *Journal of Materials Chemistry C*, 2022, **10**, 1105-1117.
5. S. Liang, M. Shang, H. Lian, K. Li, Y. Zhang and J. Lin, *Journal of Materials Chemistry C*, 2016, **4**, 6409-6416.
6. Z. Kang, S. Wang, T. Seto and Y. Wang, *Advanced Optical Materials*, 2021, **9**.
